# Supplementary material for: 25 Years of Contrast-Enhanced MRI: Developments, Current Challenges and Future Perspectives
Source: PubMed Central journal article supplement — Adv Ther. 2016 Jan 25;33(1):1–28. doi: 10.1007/s12325-015-0275-4 (PMC4735235; doi:10.1007/s12325-015-0275-4), 2016-01-25
Supplement: 12325_2015_275_MOESM1_ESM.pdf [file 12325_2015_275_MOESM1_ESM.pdf]

- Contrast-enhanced magnetic resonance imaging (CE-MRI) has become an essential tool for disease diagnosis and management worldwide.
- Use of CE-MRI as a diagnostic imaging tool has expanded rapidly.
- Cardiac MRI has the capability to visualize cardiac function and morphology.
- Contrast media will be indispensable in most MRI examinations in the future.
- New techniques are bringing exciting novel possibilities for MRI.

This summary slide represents the opinions of the authors. Sponsorship for this study was funded by Bayer Healthcare. Medical writing assistance for this study was provided by Claire Price of PAREXEL International, and funded by Bayer HealthCare. For a full list of acknowledgments and disclosures for all authors of this article, please see the full text online. © The Author(s) 2015. Creative Commons Attribution Noncommercial License (CC BY-NC).
